# Supplementary material for: Analysis of intra-genomic GC content homogeneity within prokaryotes
Source: Springer Nature journal article supplement (doi:10.1186/1471-2164-11-464), 2010-01-01

**Carsonella ruddii**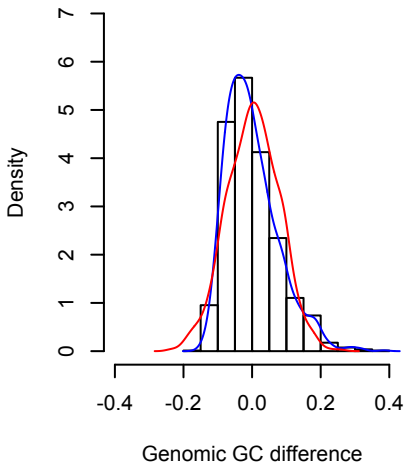**Borrelia recurrentis**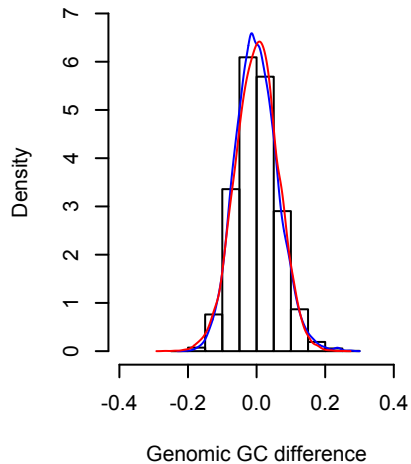**Ehrlichia ruminantis**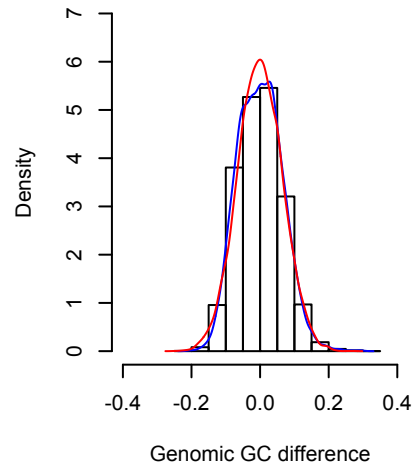**Fusobacterium nucleatum**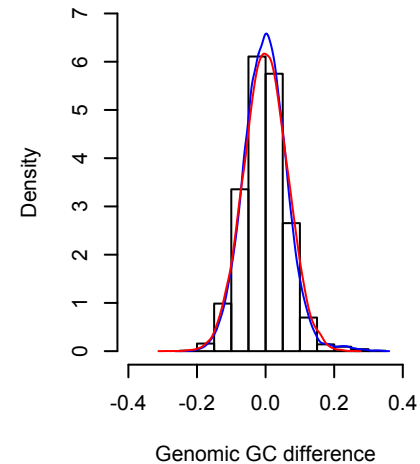**Anaeromyxobacter dehalogens**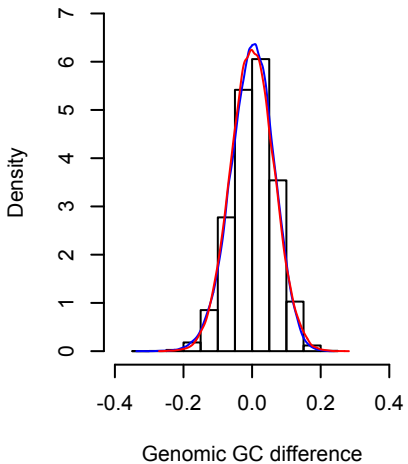**Streptomyces griseus**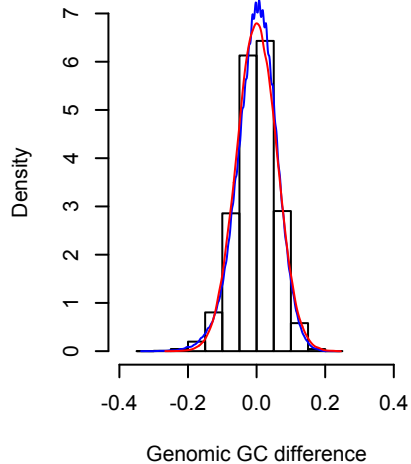**Kineococcus radiotolerans**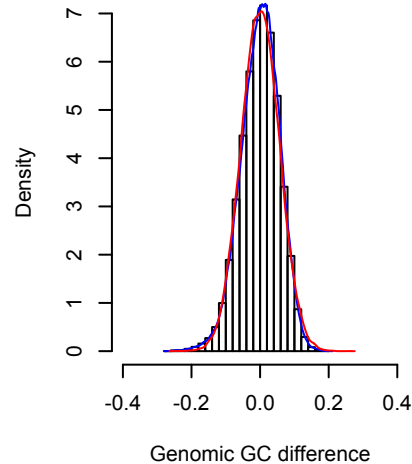**Sorangium cellulosum**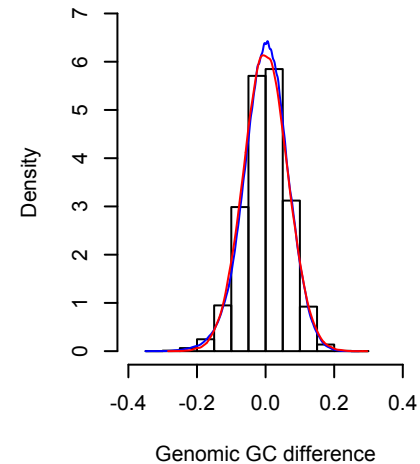

Supplement: 12864_2010_3058_MOESM4_ESM.pdf [file 12864_2010_3058_MOESM4_ESM.pdf]
