# Supplementary figures and images for: Analysis of intra-genomic GC content homogeneity within prokaryotes
Source: Springer Nature journal article supplement (doi:10.1186/1471-2164-11-464), 2010-01-01

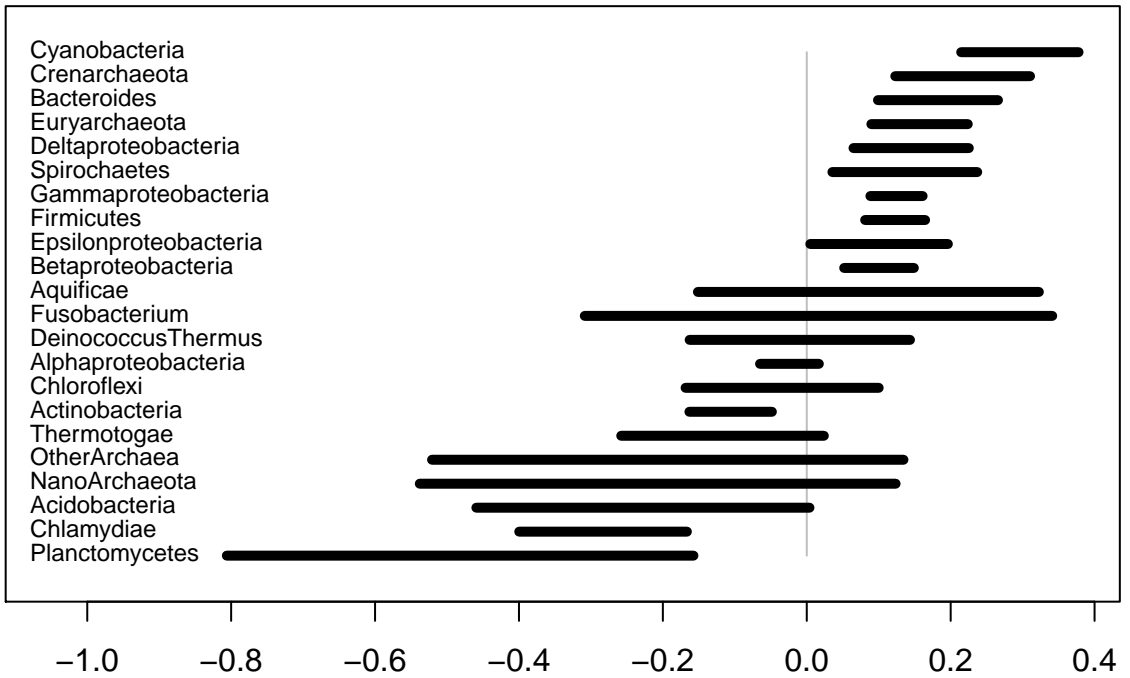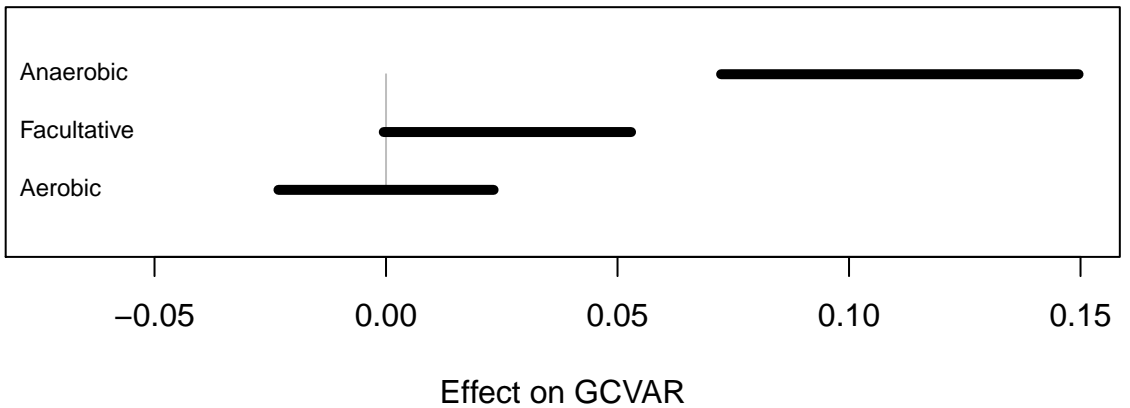

Supplement: 12864_2010_3058_MOESM2_ESM.pdf [file 12864_2010_3058_MOESM2_ESM.pdf]

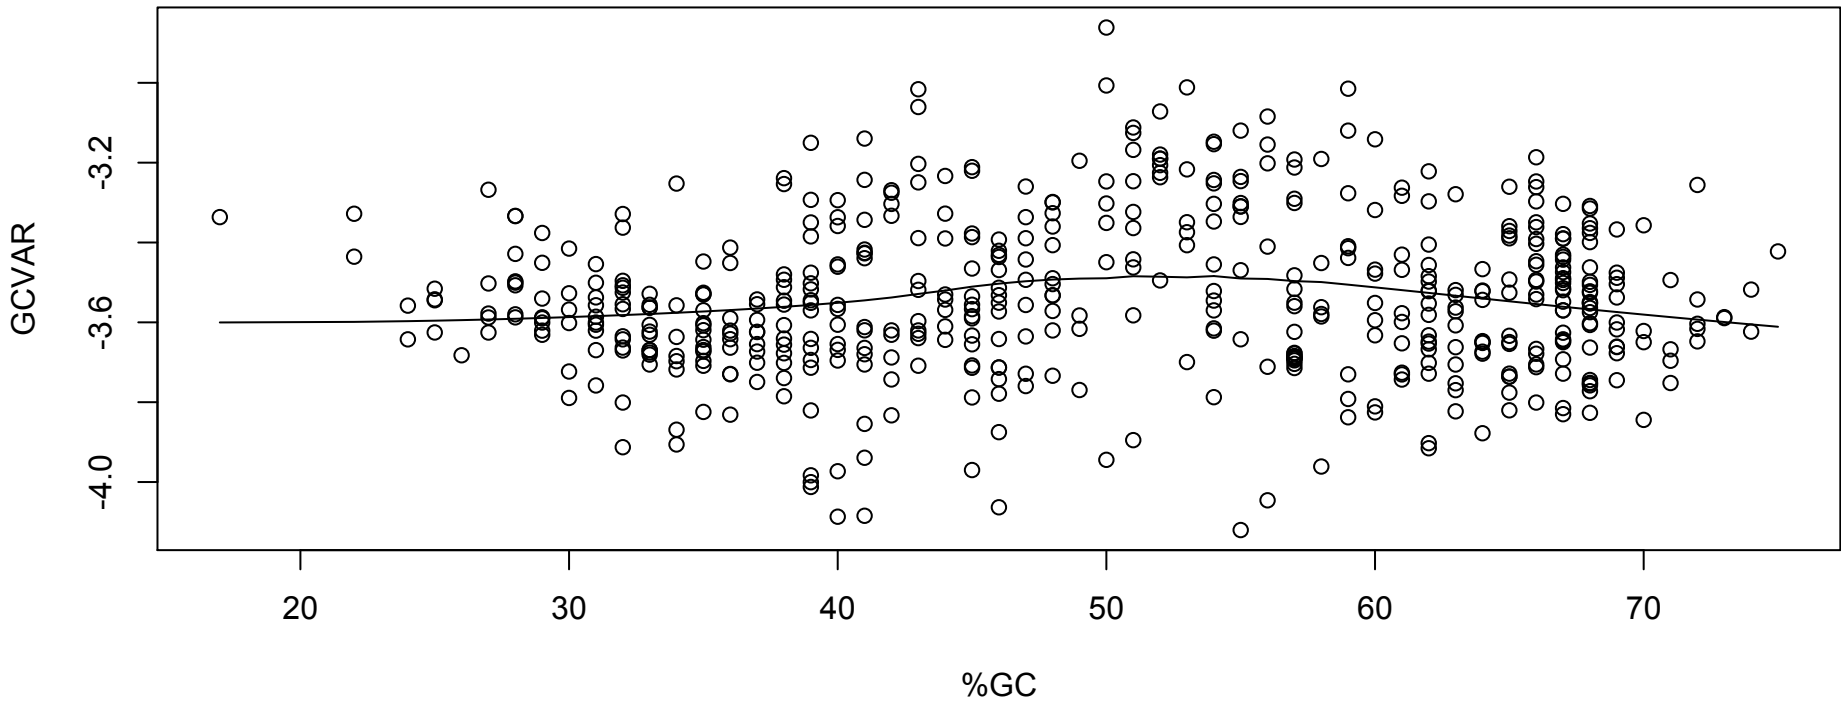

Supplement: 12864_2010_3058_MOESM3_ESM.pdf [file 12864_2010_3058_MOESM3_ESM.pdf]
